# Supplementary material for: Canine Alveolar Echinococcosis: An Emerging and Costly Introduced Problem in North America
Source: Hindawi journal article supplement (doi:10.1155/2023/5224160), 2023-02-21
Supplement: f1 [file 5224160.f1.pdf]

**SUPPLEMENTARY INFORMATION**

1

2

3 **Table S1. Direct cost of canine AE treatment (Breakdown of costs)**

**Scenario 1: Basic work-up, diagnosis, euthanasia**

|    | <b>Procedure</b>                | <b>Cost (Canadian dollars)</b> |
|----|---------------------------------|--------------------------------|
| 1  | Consultation                    | 84-236                         |
| 2  | CBC/Chem/UA                     | 180                            |
| 3  | IV Catheterization (IVC)        | 53                             |
| 4  | Sedation and Monitoring         | 63                             |
| 5  | Abdominal Ultrasound            | 365-486                        |
| 6  | Thoracic radiographs            | 166                            |
| 7  | U/S guided fine needle aspirate | 100                            |
| 8  | Cytology                        | 104                            |
| 9  | PCR plus shipping               | 133                            |
| 10 | Euthanasia                      | 68                             |
| 11 | <b>Total</b>                    | <b>1,317-1,590</b>             |

**Scenario 2: Basic work-up, diagnosis, palliative treatment with albendazole life long**

|    |                                    |                                                  |
|----|------------------------------------|--------------------------------------------------|
| 1  | Consultation                       | 84-236                                           |
| 2  | CBC/Chem/UA                        | 180.64                                           |
| 3  | IV Catheterization (IVC)           | 53                                               |
| 4  | Sedation and Monitoring            | 63                                               |
| 5  | Abdominal Ultrasound               | 365-486                                          |
| 6  | Thoracic radiographs               | 166                                              |
| 7  | U/S guided fine needle aspirate    | 100                                              |
| 8  | Cytology                           | 104                                              |
| 9  | PCR plus shipping                  | 133                                              |
| 10 | Praziquantel                       | 17-46                                            |
| 11 | <b>Initial Total</b>               | <b>1,161-1463</b>                                |
|    | <b>Long term</b>                   |                                                  |
| 12 | First year rechecks and Blood work | 678.49                                           |
| 13 | Subsequent years (5-10)            | 2097-4719                                        |
| 14 | Annual imaging                     | 647-768 (including IVC, sedation and monitoring) |
| 15 | Albendazole/year                   | 159-324                                          |
| 16 | <b>Long term total</b>             | <b>3,582-6,490</b>                               |
| 17 | <b>Overall total</b>               | <b>4,744-7,954</b>                               |

**Scenario 3: Full work-up, diagnosis, surgical planning, surgery, hospitalization, lifelong albendazole, no complication**

|   |                       |        |
|---|-----------------------|--------|
| 1 | Consultation          | 84-236 |
| 2 | CBC/Chem/UA           | 180    |
| 3 | PT                    | 50     |
| 4 | PIT                   | 50     |
| 5 | Canine blood grouping | 73     |

|    |                                    |                                                     |
|----|------------------------------------|-----------------------------------------------------|
| 6  | IV Catheterization                 | 53                                                  |
| 7  | Sedation and Monitoring            | 63                                                  |
| 8  | CT (2 sites +contrast)             | 1,004-1,124                                         |
| 9  | U/S guided FNA                     | 100                                                 |
| 10 | Cytology                           | 104                                                 |
| 11 | Surgical set up (basic)            | 92                                                  |
| 12 | Anesthesia induction               | 326                                                 |
| 13 | Every following 15 mins            | 42*6=252                                            |
| 14 | Surgical removal of lesions        | 500-1000                                            |
| 15 | ICU admission                      | 79                                                  |
| 16 | 48 hours in ICU Tier 2             | 630                                                 |
| 17 | 48 hours barrier nursing           | 158                                                 |
| 18 | Perioperative meds                 | 400-500                                             |
| 19 | Histopathology                     | 199                                                 |
| 20 | PCR plus shipping                  | 133                                                 |
| 21 | Praziquantel                       | 17-46                                               |
| 22 | <b>Initial total</b>               | <b>4,550-5,404</b>                                  |
|    | <b>Long term</b>                   |                                                     |
| 23 | First year rechecks and Blood work | 678                                                 |
| 24 | Subsequent years (5-10)            | 2097-4719                                           |
| 25 | Annual imaging                     | 647-768 (including IVC and sedation and monitoring) |
| 26 | Albendazole/year                   | 159-324                                             |
| 27 | <b>Long term total</b>             | <b>3,582-6,490</b>                                  |
| 28 | <b>Overall total</b>               | <b>4,744-7,954</b>                                  |

**Scenario 4: Full work-up, diagnosis, surgical planning, surgery, hospitalization, post-op hemorrhage requiring transfusion, higher level of ICU care, life-long albendazole**

|    |                             |           |
|----|-----------------------------|-----------|
| 1  | Consultation                | 84-236    |
| 2  | CBC/Chem/UA                 | 180.64    |
| 3  | PT                          | 50        |
| 4  | PIT                         | 50        |
| 5  | Canine blood grouping       | 73        |
| 6  | IV Catheterization          | 53        |
| 7  | Sedation and Monitoring     | 63        |
| 8  | CT (2 sites +contrast)      | 1004-1124 |
| 9  | U/S guided FNA              | 100       |
| 10 | Cytology                    | 104       |
| 11 | Surgical set up (basic)     | 92        |
| 12 | Anaesthesia induction       | 326       |
| 13 | Every following 15 mins     | 42*6=252  |
| 14 | Surgical removal of lesions | 500-1000  |
| 15 | ICU Admission               | 79        |
| 16 | 24 hours in ICU Tier 3      | 446       |
| 17 | 48 hours in ICU Tier 2      | 630       |
| 18 | 72 hours barrier nursing    | 237       |
| 19 | 1-unit PRBCs                | 105       |

|    |                                    |                                                     |
|----|------------------------------------|-----------------------------------------------------|
| 20 | Perioperative meds                 | 400-500                                             |
| 21 | Histopathology                     | 199                                                 |
| 22 | PCR plus shipping                  | 133                                                 |
| 23 | Praziquantel                       | 17-46                                               |
| 24 | Initial Total                      | 5,264-6,164                                         |
|    | <b><i>Long term</i></b>            |                                                     |
| 23 | First year rechecks and Blood work | 678                                                 |
| 24 | Subsequent years (5-10)            | 2,097-4,719                                         |
| 25 | Annual imaging                     | 647-768 (including IVC and sedation and monitoring) |
| 26 | Albendazole/year                   | 159-324                                             |
| 27 | <b><i>Long term total</i></b>      | <b>3,582-6,490</b>                                  |
| 28 | <b>Overall total</b>               | <b>8,846-12,655</b>                                 |

4

5 **Abbreviations:**

6 CBC: complete blood count

7 Chem: Blood chemistry test

8 UA: Urinalysis

9 IVC: Intravenous catheterization

10 U/S: Ultrasound

11 PCR: Polymerase chain reaction

12 PT: Prothrombin time

13 PIT: Platelet count

14 ICU: Intensive care unit

15 CT: Computed tomography

16 PRBCs: Packet red blood cells

17

18
